# Supplementary material for: Dirhodium(II) carboxylate complexes as building blocks. Synthesis and structures of square boxes with tilted walls †
Source: Royal Society of Chemistry journal article supplement (doi:10.1039/b008060h), 2000-01-01
Supplement: b008060h.doc [file b008060h.doc]

**Supplementary information.**

Macrocycles **2** – **5** were prepared by heating a 1:1 mixture of (*meta*-Ph(OC(Me)2CO2)2)Rh2(OAc)2 and 2,5-dihydroxybenzene-1,4-dicarboxylic acid, naphthalene-1,4-dicarboxylic acid, 2,3,5,6-tetrachlorobenzene-1,4-dicarboxylic acid or 2,3,5,6-tetramethylbenzene-1,4-dicarboxylic acid in *N,N*-dimethylaniline at 140 C for 24 h. The concentration of both reactants was 0.045 M. Cyclic tetramers were the major species in each case. No attempt was made to optimise yields, which are for pure material isolated after chromatography and crystallisation.

Analytical data for **2**: 68% (Found: C, 38.6; H, 3.1. (C22H20O12Rh2)4 requires C, 38.73; H, 2.96);

**H(200 MHz, 10% v/v d4-MeOH in CDCl3) 1.29 (48 H, s), 6.00 (4 H, t, J 2.1), 6.50 (8 H, dd, J 8, 2.1), 7.07 (4 H, t, J 8), 7.18 (8 H, s); *m*/*z* (FABMS) 2793 (M+).

Analytical data for **3**: 23% **H(200 MHz, 10% v/v d4-MeOH in CDCl3) 1.40 (48 H, s), 6.22 (4 H, t, J 2.1), 6.56 (8 H, dd, J 8, 2.1), 7.13 (4 H, t, J 8), 7.31 (8H, dd, J 6.6, 3.3), 7.44 (8 H, s), 8.01 (8H, dd, J 6.6, 3.3); *m*/*z* (FABMS) 2801 (M+).

Analytical data for **4**: 45% **H(200 MHz, 10% v/v d4-MeOH in CDCl3) 1.37 (48 H, s), 1.37 (48 H, s), 6.13 (4 H, t, J 2.1), 6.52 (8 H, dd, J 8, 2.1), 7.09 (4 H, t, J 8); *m*/*z* (FABMS) 2825 (M+).

Analytical data for **5**: 38% **H(200 MHz, 10% v/v d4-MeOH in CDCl3) 1.36 (48 H, s), 6.09 (4 H, t, J 2.1), 6.52 (8 H, dd, J 8, 2.1), 7.10 (4 H, t, J 8); *m*/*z* (FABMS) 3151 (M+, central peak of isotopomer distribution).
